# Supplementary material
Source: ML conference proceedings conference paper supplement (https://openreview.net/forum?id=9HiGqC9C-KA)
Supplement: supplementary_material [file attachment]

## A APPENDIX

### A.1 DATA STATISTICS OF 7 DATASETS

Table 5: Data statistics of 7 datasets. “Original” and “After Preprocessing” refer to the initial and preprocessed data statistics. “avg KCs” denotes the number of average KCs per question.

| Datasets        | Original     |           |           |     |         | After Preprocessing |           |           |     |         |
|-----------------|--------------|-----------|-----------|-----|---------|---------------------|-----------|-----------|-----|---------|
|                 | interactions | sequences | questions | KCs | avg KCs | interactions        | sequences | questions | KCs | avg KCs |
| Statics2011     | 194,947      | 333       | 1,224     | -   | -       | 189,292             | 1,034     | 1,223     | -   | -       |
| ASSISTments2009 | 346,860      | 4,217     | 26,688    | 123 | 1.1969  | 337,415             | 4,661     | 17,737    | 123 | 1.1970  |
| ASSISTments2015 | 708,631      | 19,917    | -         | 100 | -       | 682,789             | 19,292    | -         | 100 | -       |
| Algebra2005     | 809,694      | 574       | 210,710   | 112 | 1.3634  | 884,098             | 4,712     | 173,113   | 112 | 1.3634  |
| Bridge2006      | 3,679,199    | 1,146     | 207,856   | 493 | 1.0136  | 1,824,310           | 9,680     | 129,263   | 493 | 1.0136  |
| NIPS34          | 1,382,727    | 4,918     | 948       | 57  | 1.0148  | 1,399,470           | 9,401     | 948       | 57  | 1.0148  |
| POJ             | 996,240      | 22,916    | 2,750     | -   | -       | 987,593             | 20,114    | 2,748     | -   | -       |

### A.2 MORE VISUALIZATION OF SIMPLEKT

We provide more visualization samples of SIMPLEKT in Figures 6-8.

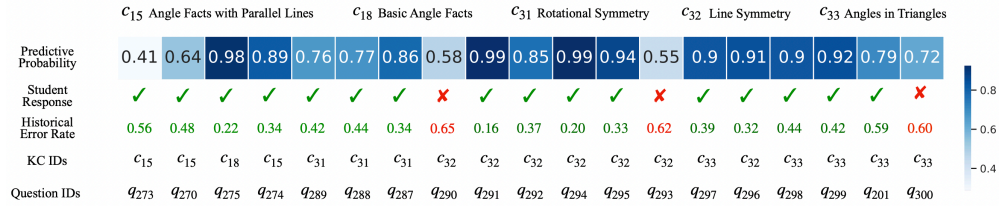

Figure 6: Visualization of student 2’s prediction results on SIMPLEKT.

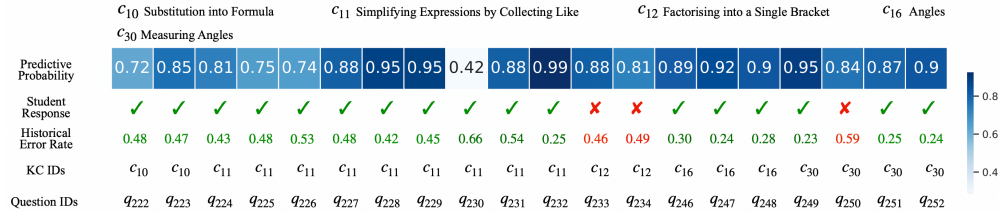

Figure 7: Visualization of student 3’s prediction results on SIMPLEKT.

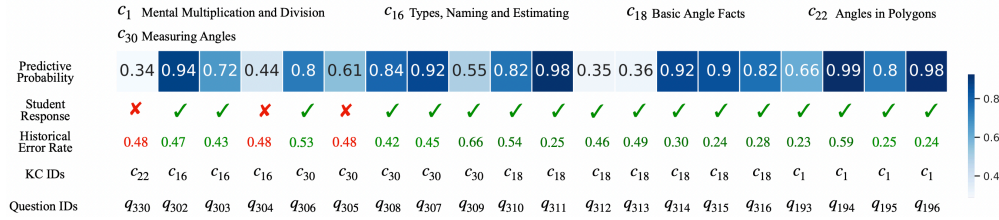

Figure 8: Visualization of student 4’s prediction results on SIMPLEKT.
